# Supplementary material for: PARP1 Regulates Circular RNA Biogenesis though Control of Transcriptional Dynamics
Source: Cells. 2023 Apr 14;12(8):1160. doi: 10.3390/cells12081160 (PMC10136798; doi:10.3390/cells12081160)
Supplement: Supplementary file 1 [file cells-12-01160-s001.zip › Supplemental Tables 2-17-2023.xlsx]

## Sheet: S1 CircRNA combined
Table S1: All circRNA detected
Host Gene Name	Genomic Coordinates	Type
ABCD	4:185826-186840	circRNA
Acsl	2R:8674646-8676607	circRNA
AGO3	3L:23634249-23649372	circRNA
alpha-Cat	3L:23325641-23331015	circRNA
alpha-Cat	3L:23325641-23334740	circRNA
alpha-Cat	3L:23326687-23334740	circRNA
alphaSnap	3L:20314612-20314925	circRNA
AnxB9	3R:21067445-21069019	circRNA
ap	2R:5708610-5709099	circRNA
ap	2R:5708610-5717766	circRNA
ap	2R:5716648-5717763	circRNA
ap	2R:5716648-5717766	circRNA
ap	2R:5717281-5717766	circRNA
aPKC	2R:14961385-14961841	circRNA
Arf51F	2R:15323841-15324902	circRNA
Arp3	3L:8115412-8115580	circRNA
Asator	4:480034-480691	circRNA
ATP8B	3R:12082574-12082881	circRNA
B4	2L:13534906-13547161	circRNA
bif	X:11687461-11689543	circRNA
bun	2L:12460587-12460760	circRNA
bun	2L:12460588-12460751	circRNA
bun	2L:12460594-12460767	circRNA
bun	2L:12536274-12540900	circRNA
Cam	2R:12269192-12269435	circRNA
capt	2L:1158078-1158262	circRNA
CCT2	X:9090487-9091177	circRNA
cdi	3R:19087404-19088300	circRNA
Cdk4	2R:16582870-16583036	circRNA
CG11790	3R:25048451-25048781	circRNA
CG13124	2L:9905874-9906443	circRNA
CG13551	2R:23382621-23383112	circRNA
CG17508	2R:5609012-5609489	circRNA
CG17691	2R:1596193-1596464	circRNA
CG17691	2R:1596195-1596464	circRNA
CG18659	2R:9124743-9126066	circRNA
CG18659	2R:9125550-9126066	circRNA
CG2846	3R:7912928-7913289	circRNA
CG31156	3R:22610961-22610962	circRNA
CG31324	3R:26124434-26124657	circRNA
CG32369	3L:7803268-7804707	circRNA
CG32521	X:21211079-21211799	circRNA
CG34383	3R:13756375-13761767	circRNA
CG3961	3L:18887060-18887746	circRNA
CG40178	3L:25843724-25874384	circRNA
CG40178	3L:25843724-25961540	circRNA
CG40178	3L:25873859-25874384	circRNA
CG40178	3L:25873859-25933410	circRNA
CG40178	3L:25924295-25961540	circRNA
CG40178	3L:25924295-25978150	circRNA
CG40178	3L:25933195-25978150	circRNA
CG40178	3L:25961359-26008177	circRNA
CG41099	3R:3849498-3850235	circRNA
CG41378	2R:2830707-2831043	circRNA
CG41378	2R:2830868-2831033	circRNA
CG42663	2R:12722304-12723006	circRNA
CG42663	2R:12722304-12735119	circRNA
CG42674	3L:20153170-20153332	circRNA
CG42676	3L:1805009-1805708	circRNA
CG45050	3R:9354421-9355083	circRNA
CG4511	3R:10854510-10855028	circRNA
CG45263	3R:8443392-8444687	circRNA
CG45782	3L:25421160-25421783	circRNA
CG4617	X:7102717-7102718	circRNA
CG46385	2R:7778474-7779885	circRNA
CG5151	3L:16148407-16148958	circRNA
CG6230	2L:11116909-11117102	circRNA
CG8671	2L:21273323-21275806	circRNA
CG9743	3R:30198493-30198894	circRNA
CG9922	3R:14035443-14035679	circRNA
chic	2L:5976610-5976782	circRNA
chic	2L:5976610-5979704	circRNA
chic	2L:5979411-5979704	circRNA
cindr	3R:30816874-30818207	circRNA
cora	2R:19238151-19241785	circRNA
crc	2L:21311752-21312208	circRNA
crp	2L:16278862-16279169	circRNA
ct	X:7645779-7646979	circRNA
ct	X:7645779-7661138	circRNA
CtBP	3R:13019341-13021642	circRNA
ctrip	3R:4795736-4797697	circRNA
cv-c	3R:14427036-14427761	circRNA
Dbp80	3L:27331993-27332346	circRNA
Dbp80	3L:27331993-27350321	circRNA
Doa	3R:28889765-28901022	circRNA
Dscam1	2R:7322559-7368732	circRNA
Dscam1	2R:7361717-7368732	circRNA
Dys	3R:19493964-19507079	circRNA
EcR	2R:6122881-6123847	circRNA
Ect4	3L:8093058-8099536	circRNA
Ect4	3L:8098345-8099536	circRNA
Ect4	3L:8099145-8099536	circRNA
eIF5B	3L:3432203-3432365	circRNA
eIF5B	3L:3432203-3447724	circRNA
eIF5B	3L:3443457-3447724	circRNA
eIF5B	3L:3445364-3447724	circRNA
Eip63E	3L:3578288-3578480	circRNA
Eip63E	3L:3578288-3588080	circRNA
ena	2R:19158733-19159352	circRNA
FER	3R:9372755-9373875	circRNA
foxo	3R:14079345-14082185	circRNA
Fpps	2R:11305878-11306097	circRNA
fwd	3L:313023-314317	circRNA
gce	X:15305828-15306579	circRNA
gce	X:15310377-15311216	circRNA
Gdap2	2R:7725688-7729158	circRNA
Gdap2	2R:7727941-7729708	circRNA
Gdh	3R:23937422-23938555	circRNA
Glg1	3L:21500557-21504359	circRNA
Glut4EF	3R:9943480-9943894	circRNA
GMF	2L:16302270-16302609	circRNA
Gprk1	2R:4378368-4379155	circRNA
Gprk1	2R:4407980-4427997	circRNA
Gprk2	3R:31453310-31454764	circRNA
Gug	3L:8463003-8468923	circRNA
Gyc76C	3L:19780039-19780279	circRNA
Hipk	3L:547481-548067	circRNA
HmgD	2R:21715403-21715613	circRNA
hrg	2R:19665524-19668478	circRNA
hts	2R:19407840-19408593	circRNA
ImpL2	3L:4224926-4225706	circRNA
IP3K2	X:13318414-13319047	circRNA
Irk1	3R:23169895-23170480	circRNA
kra	3R:5596860-5599364	circRNA
KrT95D	3R:24012982-24031031	circRNA
l(1)G0196	X:22493480-22494275	circRNA
larp	3R:28333708-28334707	circRNA
lola	2R:10515834-10533968	circRNA
lola	2R:10532038-10533968	circRNA
luna	2R:10989627-10991124	circRNA
luna	2R:11099531-11100114	circRNA
Maf1	2R:1515889-1521559	circRNA
Maf1	2R:1516221-1521559	circRNA
mamo	X:13883235-13885500	circRNA
Mes2	3L:22946269-22946570	circRNA
MFS17	2R:2520578-2522730	circRNA
mgl	X:9471998-9473266	circRNA
milt	2L:7040472-7041159	circRNA
mir-4941	3L:16031180-16031288	circRNA
mld	3R:24616050-24621113	circRNA
Mlf	2R:15939040-15939256	circRNA
Mmp1	2R:24682213-24682441	circRNA
mod(mdg4)	3R:21375059-21375912	circRNA
Moe	X:8876572-8880400	circRNA
Msr-110	3L:5569118-5569361	circRNA
mtd	3R:5292639-5296635	circRNA
mtd	3R:5294061-5299573	circRNA
mtd	3R:5298201-5299573	circRNA
mtgo	2L:16621835-16622841	circRNA
mura	3R:9546797-9547370	circRNA
ND-MLRQ	3L:23339429-23339680	circRNA
ND-MLRQ	3L:23341456-23341602	circRNA
NFAT	X:13649376-13656034	circRNA
Nipped-A	2R:5180549-5181767	circRNA
Nipped-A	2R:5241895-5246137	circRNA
Nipped-B	2R:4698502-4722325	circRNA
Nipped-B	2R:4698502-4728551	circRNA
Nipped-B	2R:4711813-4722325	circRNA
Nipped-B	2R:4711813-4728551	circRNA
Nmda1	2R:12879221-12879372	circRNA
nolo	2L:21710563-21719643	circRNA
nonA	X:16363357-16365642	circRNA
nrv1	2L:6780031-6780289	circRNA
Nup154	2L:11009632-11009812	circRNA
Nurf-38	2R:24558972-24559563	circRNA
pan	4:72320-75165	circRNA
pan	4:72320-87166	circRNA
pan	4:85711-87166	circRNA
Parp	3R:3468908-3469478	circRNA
Parp	3R:3523413-3523947	circRNA
Patronin	2R:17526833-17528105	circRNA
Pax	2L:19409403-19409910	circRNA
Pde11	2L:18541184-18543715	circRNA
Pde8	2R:23665293-23666035	circRNA
Pde9	X:12829709-12832340	circRNA
Pde9	X:12829709-12886669	circRNA
Pdk1	3L:135457-136335	circRNA
PGRP-LC	3L:9342164-9345067	circRNA
pigs	X:6630704-6631105	circRNA
PIP4K	4:1193559-1193859	circRNA
PIP4K	4:1193559-1196477	circRNA
PIP4K	4:1195427-1196477	circRNA
Pka-C3	3L:15946907-15947579	circRNA
Pkn	2R:9265489-9267976	circRNA
PlexA	4:1022241-1023680	circRNA
pnr	3R:16038586-16039546	circRNA
pnt	3R:23311981-23313558	circRNA
pnt	3R:23311981-23340527	circRNA
pnt	3R:23312886-23313558	circRNA
pnt	3R:23337895-23340527	circRNA
porin	2L:10848550-10848853	circRNA
Ppn	3R:28522481-28523260	circRNA
prage	X:1843691-1844087	circRNA
ps	3R:9432028-9432839	circRNA
psq	2R:10561685-10562190	circRNA
puc	3R:8111076-8111301	circRNA
Pur-alpha	4:560094-560583	circRNA
Pur-alpha	4:560094-560820	circRNA
Pvf1	X:18837992-18838342	circRNA
Pvf1	X:18840381-18841120	circRNA
Pvf2	2L:7074252-7083728	circRNA
Pvf2	2L:7074253-7074356	circRNA
Pvf2	2L:7074253-7083728	circRNA
Pvr	2L:8223824-8227826	circRNA
Rho1	2R:16103610-16103774	circRNA
RhoGAP92B	3R:19908433-19908609	circRNA
rl	2R:1076634-1080441	circRNA
rl	2R:1076634-1105981	circRNA
rl	2R:1105846-1113725	circRNA
robo2	2L:1384926-1397252	circRNA
RpL13	2L:9967948-9968244	circRNA
RpL27A	2L:4457738-4458054	circRNA
RpL28	3L:3221117-3221699	circRNA
RpL29	2R:21294063-21294398	circRNA
RpL3	3R:11222174-11224247	circRNA
RpL30	2L:19008946-19009139	circRNA
RpL31	2R:9587444-9587696	circRNA
RpL31	2R:9587447-9587699	circRNA
RpL36	X:628335-628677	circRNA
RpL36	X:628337-628680	circRNA
RpL36	X:628354-628679	circRNA
RpL5	2L:22535616-22536378	circRNA
RpLP1	2L:420301-420689	circRNA
RpS11	2R:12199843-12200247	circRNA
RpS16	2R:22606245-22607046	circRNA
RpS18	2R:20264075-20264422	circRNA
RpS18	2R:20264076-20264423	circRNA
RpS18	2R:20264082-20264429	circRNA
RpS18	2R:20264082-20264432	circRNA
RpS25	3R:11215415-11215623	circRNA
RpS27	3R:25246447-25246657	circRNA
RpS28b	X:9554998-9555209	circRNA
RpS3A	4:67047-67206	circRNA
RpS3A	4:67049-67197	circRNA
RpS3A	4:67051-67214	circRNA
RpS5a	X:17144617-17145132	circRNA
RpS7	3R:30208092-30208657	circRNA
SCaMC	3L:12412010-12414086	circRNA
sd	X:15819595-15820553	circRNA
SelR	3R:10866528-10866960	circRNA
sgg	X:2641124-2642093	circRNA
shep	3L:5166934-5170440	circRNA
shep	3L:5166967-5170440	circRNA
shot	2R:13916853-13917910	circRNA
simj	3L:10685963-10686261	circRNA
Smr	X:12730933-12732400	circRNA
Snx6	2L:8218572-8219296	circRNA
spen	2L:175360-175447	circRNA
spi	2L:19571571-19571767	circRNA
spri	X:10519347-10519777	circRNA
spri	X:10575389-10576156	circRNA
spri	X:10578238-10578606	circRNA
Src42A	2R:5997763-6001423	circRNA
Stat92E	3R:20539220-20541553	circRNA
stw	2R:5423749-5424239	circRNA
Svil	3L:2434625-2461268	circRNA
Svil	3L:2439498-2446101	circRNA
Syx16	X:20393359-20393496	circRNA
tai	2L:9191614-9235263	circRNA
tai	2L:9233987-9235263	circRNA
Ten-m	3L:22307546-22308191	circRNA
Ten-m	3L:22307546-22340641	circRNA
Tlk	X:3781654-3784706	circRNA
Tlk	X:3783676-3784441	circRNA
Tm1	3R:15295114-15295525	circRNA
Tmem18	2R:12436328-12436663	circRNA
tmod	3R:30571808-30573072	circRNA
tmod	3R:30577178-30577558	circRNA
Tomosyn	X:12635731-12640839	circRNA
Tomosyn	X:12635731-12644767	circRNA
Trpm	2R:15292772-15293561	circRNA
uex	2R:3918150-3933463	circRNA
uex	2R:3918150-3938885	circRNA
uex	2R:3918150-3943335	circRNA
uex	2R:3938551-3938885	circRNA
Uhg4	2R:9095897-9096735	circRNA
unc-13	4:882960-903471	circRNA
unc-13	4:898392-909184	circRNA
ush	2L:489516-491358	circRNA
ush	2L:489517-491360	circRNA
vir-1	2L:12409455-12409623	circRNA
wnd	3L:19629264-19629753	circRNA
wts	3R:30800037-30800963	circRNA
zfh1	3R:30773569-30774694	circRNA
zfh1	3R:30773572-30774697	circRNA
zfh1	3R:30773572-30774701	circRNA
zfh1	3R:30773986-30774697	circRNA
Ziz	2L:7476978-7483627	circRNA
	2R:5708610-5717763	circRNA
	2R:803314-803655	circRNA
AGO1	2R:13953267-13953335	ciRNA
Arp2	X:16553552-16553742	ciRNA
asRNA	2R:12868195-12868392	ciRNA
asRNA	3R:14569014-14569135	ciRNA
asRNA	3R:14569016-14569138	ciRNA
asRNA	X:11791203-11791367	ciRNA
B52	3R:13663064-13665452	ciRNA
brp	2R:9532185-9532345	ciRNA
Bsg	2L:8089057-8089184	ciRNA
bun	2L:12460750-12461159	ciRNA
CAP	2R:10295050-10295282	ciRNA
CG11699	X:11571504-11571637	ciRNA
CG15343	X:8273480-8273682	ciRNA
CG17278	3R:21021591-21021842	ciRNA
CG2082	3R:5780761-5780854	ciRNA
CG3164	2L:128948-129111	ciRNA
CG31955	2L:3712441-3712628	ciRNA
CG8963	2R:17018258-17018366	ciRNA
CG8963	2R:17018267-17018375	ciRNA
CHKov1	3R:25324418-25324532	ciRNA
CLIP-190	2L:17385365-17385451	ciRNA
cora	2R:19240870-19241222	ciRNA
cora	2R:19242577-19242703	ciRNA
D1	3R:9239908-9239994	ciRNA
Dg	2R:16085610-16085789	ciRNA
eRF1	3L:20348414-20348509	ciRNA
ewg	X:271613-271812	ciRNA
Fer1HCH	3R:30387550-30387683	ciRNA
Fkbp14	2R:21497645-21497775	ciRNA
fl(2)d	2R:13823988-13824465	ciRNA
Galphas	2R:23946531-23946598	ciRNA
Ggamma1	2R:8902189-8902326	ciRNA
Ggamma1	2R:8902250-8902324	ciRNA
GramD1B	2L:3362728-3362949	ciRNA
Hk	X:10260922-10261248	ciRNA
l(1)G0196	X:22502029-22502187	ciRNA
l(1)G0196	X:22502514-22502643	ciRNA
l(1)G0196	X:22502541-22502628	ciRNA
l(1)G0196	X:22502567-22502626	ciRNA
Lasp	3L:16679473-16679762	ciRNA
Lasp	3L:16679478-16679675	ciRNA
Lint-1	X:11152228-11152232	ciRNA
lncRNA	3L:229501-229582	ciRNA
mam	2R:14039978-14040122	ciRNA
mam	2R:14058586-14058767	ciRNA
miple2	3L:271784-271920	ciRNA
Moca-cyp	3R:28342084-28342191	ciRNA
msn	3L:2558032-2558382	ciRNA
msn	3L:2558035-2558385	ciRNA
Nmda1	2R:12879222-12879373	ciRNA
Nopp140	3L:21835900-21835977	ciRNA
Pect	2L:13209313-13209500	ciRNA
pre-mod(mdg4)-V	3R:21365681-21365792	ciRNA
Pvf2	2L:7083728-7083891	ciRNA
Rab11	3R:21111510-21111649	ciRNA
ReepA	2R:22925502-22925558	ciRNA
RhoGAP71E	3L:15604749-15604840	ciRNA
Ric	2R:16109436-16109482	ciRNA
Rm62	3R:6002757-6002800	ciRNA
RpL15	3L:27267291-27267426	ciRNA
RpL23	2R:22854589-22854655	ciRNA
RpL3	3R:11223280-11223384	ciRNA
sd	X:15813503-15813600	ciRNA
sky	2L:20917136-20917377	ciRNA
Slik	2R:24393506-24393616	ciRNA
Slik	2R:24393514-24394025	ciRNA
slv	2R:8083157-8083267	ciRNA
stw	2R:5416421-5416594	ciRNA
Sxl	X:7088749-7088875	ciRNA
Trf2	X:8409368-8409420	ciRNA
tws	3R:10133763-10133965	ciRNA
vir-1	2L:12404140-12404186	ciRNA
vir-1	2L:12421829-12422037	ciRNA
Zasp52	2R:15774748-15774912	ciRNA

## Sheet: S2 Primers
Table S2: List of primers used for circRNA validation
Target Name	FWD/REV	Template (cDNA/gDNA)	Sequence	Product Length
circALPHA-CAT	FWD	cDNA	CAAGTGGAGTTATTCCGTAGG	173
circALPHA-CAT	REV	cDNA	CAACAGCTGCAACTAATGC	173
ALPHA-CAT	FWD	gDNA	CTTACGAGAACCCAGACATTAC	139
ALPHA-CAT	REV	gDNA	CGCACCATATTTCCTCTCTTC	139
circLUNA	FWD	cDNA	TCGTCGTAGCCAATCAAATC	406
circLUNA	REV	cDNA	TGCAAACGCTCGTCATTTA	406
LUNA	FWD	gDNA	TTCAATCGCGAGTGCTAAA	241
LUNA	REV	gDNA	GAATGTTTCACGAACAGGAAC	241
circCDI	FWD	cDNA	GGACCCATAGGTCTGAATTTG	282
circCDI	REV	cDNA	GCATTATACTCCGTGGATGAC	282
CDI	FWD	gDNA	ATCGTGCCCGTCTAACT	219
CDI	REV	gDNA	GTCGTAACCGGATGTGTATG	219
circLOLA	FWD	cDNA	CTCAAGTTCTCCGACCTATTC	342
circLOLA	REV	cDNA	CGTCATCCATTCTGGTTTC	342
LOLA	FWD	gDNA	TCATCAGCACGCCTATCT	243
LOLA	REV	gDNA	TGCTATCCCTCCTACAATCC	243
circFRU	FWD	cDNA	GCCAGTTGAACTTGAGAGATA	205
circFRU	REV	cDNA	AAAGGGCGTATGGATTGC	205
FRU	FWD	gDNA	TCAACACACTTCTCTGCTATG	222
FRU	REV	gDNA	GGGATCAAAGTCCATTGGTAA	222
circCG42674	FWD	cDNA	CAACCGAGAGGCAAACAA	454
circCG42674	REV	cDNA	TCCCTATTCCTAACCCTAACC	454
CG42674	FWD	gDNA	TAGGGTTAGGAATAGGGATACG	158
CG42674	REV	gDNA	CGGTTGGTTGGTTTGTTTG	158
TOMOSYN	FWD	cDNA	GGCTTATGGTACCGAATATGG	155
TOMOSYN	REV	cDNA	GGCTTTGCTCCTCTTTGT	155
circTOMOSYN	FWD	gDNA	TAAGTATCAGCCGCGAGAT	219
circTOMOSYN	REV	gDNA	GTCTGAGTTCGTCCTTGTTG	219

## Sheet: S3 Skipped Exon Events in Host 
Table S3: Skipped exon events in circRNA host genes
PARP-KD vs. NT	PARPi vs. KD
pnt	crc
rl	Tm1
Arp2	ct
mtd	ewg
Msr-110	Gug
spen	Rho1
CtBP	Rab11
Nipped-B	Cdk4
l(1)G0196	CLIP-190
Pvr	Pkn
Dscam1	pigs
CG2316	Snx6
CG41099	Dscam1
CG13551	RpS11
Uhg4	Hipk
CG34394	RhoGAP71E
spri	CG2316
kra	PIP4K
Hk	vir-1
Gdh	nolo
RpS5a	MFS17
msn	CG42674
Dbp80	uex
PlexA	Patronin
CAP	Zasp52
Dg	CG45186
RhoGAP92B	mamo
PIP4K	RpL27A
vir-1	Arf51F
Pde11	Stat92E
Gprk1	unc-13
ps	PlexA
uex	l(1)G0196
milt	CG8671
Trpm	Dg
Doa	PGRP-LC
CG45186	Mes2
CG45263	Gprk1
	milt
	Trpm
	Doa
	Pde8

## Sheet: S4 intron length
Table S4: Intron and exon lengths of circRNA host genes
Genomic Feature	WT	PARPi	KD	Other Drosophila
Mean Upstream Flanking Intron Length	9130.83	14395.1	11251.1	1831.96
Mean Downstream Flanking Intron Length	9355.46	8228.17	6089.49	1831.96
Mean Internal Intron Length	3683.43	4431.32	1830.42	1831.96
Mean circRNA Exon	372.974	291.582	351.443	529.544
